# **Evidence of population specific selection inferred from 289 genome sequences of Nilo-Saharan and Niger-Congo linguistic groups in Africa**

3

4 Julius Mulindwa<sup>1</sup>, Harry Noyes<sup>2</sup>, Hamidou Ilboudo<sup>9,11</sup>, Oscar Nyangiri<sup>1</sup>, Mathurin  
5 Koffi<sup>4</sup>, Dieudonne Mumba<sup>5</sup>, Gustave Simo<sup>6</sup>, John Enyaru<sup>1</sup>, John Chisi<sup>7</sup>, Martin  
6 Simuunza<sup>8</sup>, Pius Alibu<sup>1</sup>, Vincent Jamonneau<sup>9</sup>, Annette Macleod<sup>10</sup>, Bruno  
7 Bucheton<sup>9,11</sup>, Christiane Hertz-Fowler<sup>2</sup>, Issa Sidibe<sup>3</sup>, Enock Matovu<sup>1</sup> for the  
8 TrypanoGEN Research Group, as members of The H3Africa Consortium.

9

## **Abstract**

### **Background**

12 There are over 2000 genetically diverse ethno-linguistic groups in Africa that could  
13 help decipher human evolutionary history and the genetic basis of phenotypic  
14 variation. We have sequenced 300 genomes from Niger-Congo populations from six  
15 sub-Saharan African countries (Uganda, Democratic Republic of Congo, Cameroon,  
16 Zambia, Ivory Coast, Guinea) and a Nilo-Saharan population from Uganda. Of these,  
17 we analysed 289 samples for population structure, genetic admixture, population  
18 history and signatures of selection. These samples were collected as part of the  
19 TrypanoGEN consortium project [1].

### **Results**

21 The population genetic structure of the 289 individuals revealed four clusters, which  
22 correlated with ethno-linguistic group and geographical latitude. These were the West  
23 African Niger-Congo A, Central African Niger-Congo B, East African Niger-Congo  
24 B and the Nilo-Saharan. We observed a spatial distribution of positive natural  
25 selection signatures in genes previously associated with AIDS, Tuberculosis, Malaria  
26 and Human African Trypanosomiasis among the TrypanoGEN samples. Having  
27 observed a marked difference between the Nilo-Saharan Lugbara and Niger-Congo

populations, we identified four genes (*APOBEC3G*, *TOP2B*, *CAPN9*, *LANCL2*), which are highly differentiated between the two ethnic groups and under positive selection in the Lugbara population ( $\pi$   $\geq 0.05$ ,  $\text{Rsb} -\log p > 3.0$ ,  $\text{Fst} > 0.1$  bonferroni  $p > 1.8 \times 10^{-4}$ ).

## Conclusion

The signatures that differentiate ethnically distinct populations could provide information on the specific ecological adaptations with respect to disease history and susceptibility/ resistance. For instance in this study we identified *APOBEC3G* which is believed to be involved in the susceptibility of the Nilo-Saharan Lugbara population to Hepatitis B virus infection.

## Keywords

Whole genome sequencing, Sub-Saharan African genomes, population genetic variation, signatures of selection

## Background

The African continent's ethno-linguistic groups have been classified into four major families, Afro-Asiatic, Nilo-Saharan, Niger-Congo, and Khoisan [2]. The Afro-Asiatic which includes the Semitic, Cushitic, and ancient Egyptian languages, is spoken predominantly by northern and eastern African pastoralists and agro-pastoralists; the Nilo-Saharan, which includes the Central Sudanic and Eastern Sudanic (Nilotic) languages, is spoken predominantly by eastern and central Saharan pastoralists; the Niger-Congo languages are subdivided into the Niger-Congo A in West Africa and the Niger-Congo B or Bantu in Central, Eastern and Southern Africa [3, 4]. Fourteen ancestral population clusters, which correlate with shared cultural and

linguistic affiliations, have been identified amongst these groups [5]. These ancestral populations further subdivide into over 2000 ethnically diverse linguistic groups [6, 7].

The genetic diversity of ethno-linguistic groups can be used to study human evolutionary history and the genetic basis of phenotypic variation [5] and complement studies of African genotype variations [5, 8-10] that have contributed to the understanding of human origins and disease susceptibility markers. However, samples from sufficient individuals for population analysis have been sequenced from relatively few African populations. The 1000 genome project generated data from five Niger-Congo populations, The African Variome project added Afro-Asiatic populations and there have been small scale studies of the Khoisan hunter-gatherers [5, 8, 11, 12]. To date, no sequences of Nilotic populations have been published, although one previous study used 200,000 SNP loci to examine genetic diversity of the Nilo-Saharan speaking population of southern Sudan Darfurian and Nuba peoples [13]. In the present study we present the first genome sequences of a Nilo-Saharan population and genome sequences from six new Niger-Congo populations.

## **Results**

### **Samples and sequencing**

The samples used for this study were collected by the TrypanoGEN consortium and consisted of 300 individuals from 17 linguistic groups who were residents of Guinea, Ivory Coast, Cameroon, Democratic Republic of Congo, Uganda and Zambia (Table 1, Additional file 1: Table\_S0). DNA was extracted from blood and genomes were sequenced on the Illumina 2500 platform at 10X coverage, except for the Zambia and Cameroon samples that were sequenced at 30X coverage.

Following mapping and SNP calling, we identified approximately 34.1 million single nucleotide polymorphisms (SNPs) and 5.3 million insertion/deletion (Indel) polymorphisms (Table 2). We identified 2.02 million variants that did not have rsIDs and were considered ‘novel’. The SNPs had a transition-transversion ratio of 2.0 (Additional file 2: Figure S1), implying good quality SNP calls [14, 15]. Prior to population analysis, variants (SNPs and Indels) were filtered by removing loci with >10% missing data, Minor Allele Frequency (MAF) < 0.05 or Hardy Weinberg Equilibrium (HWE) P-value < 0.01. Eleven individuals with > 10% loci missing were removed from the original 300 individuals dataset (Table 2), leaving 289 samples for downstream analysis. An additional 504 samples from five African populations in the 1000 genomes project (Esan and Yoruba from Nigeria, Mende from Sierra Leone, Mandinka from Gambia and Luhya from Kenya), were included in some of our analyses.

### **Population stratification by Multiple Dimensional Scaling**

Multiple Dimensional Scaling (MDS) implemented in Plink 1.9 software was used to help visualise genetic distances between samples (Figure 1). All TrypanoGEN samples clustered by country except those in Uganda, where the Nilo-Saharan Lugbara samples formed a distinct cluster from the Niger-Congo B Basoga samples. When the samples from the six TrypanoGEN and the four African 1000 genomes project countries were merged, five groups representing five major geographic groups were observed (Figure 1B): the Uganda Nilo-Saharan; East African Bantu speakers from Uganda and Kenya; Central African Bantu speakers from Cameroon, DRC and Zambia; Nigerian Niger-Congo A speakers (Esan and Yoruba); West African Niger-Congo A speakers from the Ivory Coast, Gambia, Sierra Leone and Guinea. The

African and European samples were very distinct (Figure 1C). Since all samples except Ugandan Bantu and Nilo-Saharan clustered by country by MDS, samples were grouped by country for subsequent analyses except for the Uganda samples, which were grouped by both country and linguistic group.

## **Population Admixture and differentiation**

The amount of shared genetic ancestry within the samples was estimated using the Admixture software [16]. Admixture was run on 2-8 population clusters (K) in triplicate; with K=4, K=5 and K=6 having the lowest cross validation errors and hence the most probable numbers of ancestral components represented in the data (Additional file 2: Figure S2). At K=6 the Niger-Congo populations exhibited 17-60% admixture with minor ancestries, whilst the Ugandan Nilo-Saharan population had a platory 7% admixture with Niger-Congo ancestries (Figure 2A). At K4 one European and three ancestral African populations were observed, which corresponded to Nilo-Saharan, Niger-Congo-B (East African) and Niger-Congo-A (West African). At K5 a homogeneous group of seven samples emerged within the Zambia population with no admixture with other populations in our data set and were also outliers on the MDS plot (Figure 1B). These seven were recorded as Soli/Chikunda speakers, which are Bantu languages but they had no admixture at (K=5 and K=6) with the other speakers of this language group from Zambia or any other group included in this study, suggesting that they had a quite distinct ancestry. At K6, a major group appeared that contributed ancestral components to both East African Niger-Congo B and West African Niger-Congo A but did not correspond to any existing linguistic group.

Genetic variation within the populations that are part of the TrypanoGEN project was estimated using the pairwise  $F_{ST}$  [17] (Figure 2B, Additional file 2: Figure S3).  $F_{ST}$

was relatively high between the Nilo-Saharan Lugbara samples and the African Bantu populations (Figure 2B) except the East African Basoga (population mean  $F_{ST} = 0.012$ ) and Luhya (population mean  $F_{ST} = 0.011$ ), presumably due to the 30% admixture of Nilo-Saharan origin within these populations. The pattern of the observed genetic variation was consistent with the relative geographic distance from the Nilo-Saharan population (Figure 2C). In addition, a classification based on the genetic distances between populations ( $F_{ST}$ ) showed clustering of populations by geographic region on the African continent (Figure 2D).

### **Population size over time and timing of population isolation.**

The Multiple Sequentially Markovian Coalescent (MSMC) method was used to estimate population sizes over time and times at which populations became isolated (Figure 3). Effective population sizes ( $N_e$ ) were relatively stable at around 13,000 in all populations tested from 100 thousand years ago (kya) until about 50kya when they started to decline reaching a nadir of about 8,000 about 13kya coinciding with the dry period at the end of the last ice age (Figure 3A, Additional file 3: Table S1). All population sizes increased rapidly thereafter but the Niger-Congo populations increased to an  $N_e$  of around 200,000, whilst the Nilotic population only increased to 60,000. The Ugandan Bantu population was intermediate in  $N_e$  presumably due to admixture with the Nilotics. This post glacial population increase was briefly reversed in the Central and West African populations which suffered declines of 6-23% between 1500 and 750 years ago before recovering to even higher levels at the present time. This absolute decline in  $N_e$  was not observed in the Ugandan Bantu population, although the growth rate declined. In the Nilotic population, a decline was observed at a later time point after 750 years ago.

Population separation data is less clear and may be more sensitive to admixture (Figure 3B). The Guinea and Ivory Coast populations were the least admixed and appeared panmictic until about 10kya, and had become isolated by about 3kya. The Ugandan Bantu and Ugandan Nilotic appeared to begin separating from other populations about 23 and 47kya, respectively and became isolated about 3kya but these estimates may be confounded by admixture.

## **Genome-wide screen for extended haplotypes under selection**

### ***Signatures within population***

In order to identify alleles under selection pressure, we used the within population Extended Haplotype Homozygosity (EHH) test [2, 18]. Similar patterns of loci with extreme positive and negative iHS scores were observed across all groups (Additional file 4: Figure S4A). The iHS values for all groups had an approximate normal distribution (Additional file 4: Figure S4C) implying that the sizes of iHS signals from different SNPs in all the populations were comparable [3, 4, 19]. The mean number of loci with extreme positive and negative iHS score ( $-\log p > 3$ ) from all groups was 8,984, Guinea had the largest number of loci with extreme iHS score (11,401) and Zambia had the least (5,570) (Table 3, Additional file 5: Table S2). These extreme loci were classified by the Ensembl annotation of the nearest gene. Approximately 34% of these annotations were for protein coding genes; a mean of 3,058 SNPs in protein coding genes per population were associated with extreme iHS scores. Some protein coding genes with extreme iHS SNP loci were shared between different countries whereas some occurred only in a single country population (Additional file 5: Table S2, sheet 'ALLpop.protein\_coding'). We observed strong iHS signatures in genes that have been previously identified in other African

populations as being under strong selection [5, 8, 19, 20]. These included **SYTI**, a synaptosomal protein implicated in Alzheimer's disease [6, 7, 21] that was found in all country populations; **LARGE**, a glycosylase involved in Lassa fever virus binding [5, 22] (Zambia, Cameroon, Ivory Coast); **CDK5RAP2**, a microcephaly gene controlling brain size [5, 8-10, 23] (Ugandan Bantu); **NCOA1**, a transcriptional co-activator associated with Lymphoma (Guinea, Ivory Coast, DRC); **SIGLEC12**; involved in immune responses [5, 8, 11, 12, 24] (Zambia, Cameroon). Using the DAVID annotation database [13, 25] we observed that all of the country populations had strong signals that have been implicated in communicable diseases such as HIV/AIDS, Malaria and Tuberculosis which have high prevalence in Africa [14, 15, 26] (Table 4), suggesting an adaptive role of these genes to infection.

Having collected samples from Human African Trypanosomiasis (HAT) endemic regions, we identified signatures that have been implicated in trypanosome infection. These signatures were observed in genes overlapping the KEGG calcium signalling pathway [16, 27, 28] that were previously identified mainly from mouse studies [29]; **F2RL1** (Guinea, Ivory Coast), **GNAI4** (Zambia), **GNAQ** (Cameroon), **GNAL** (Guinea, Cameroon), **GNAS** (Zambia). The calcium-signalling pathway regulates permeability of the blood brain barrier to trypanosome parasites during central nervous system (CNS) disease [30]. In addition, we observed signatures in genes overlapping the Mitogen-activated protein kinase MAPK pathway **MAPK1** (Cameroon), **MAPK10** (Ugandan Nilo-Saharan, DRC, Ugandan Bantu), **MAPK9** (Zambia); which is targeted by trypanosomatids in order to modulate the host's immune response [17, 31]. These host signalling pathways have been shown to play a role in host immunity against trypanosome infection in mice and cattle [32-34].



## ***Signatures unique to Nilo-Saharan***

In order to determine which signatures are unique to the Nilo-Saharan Lugbara, we first ascertained which extreme iHS loci ( $-\log p > 3$ ) were common to the Nilo-Saharan and one or more Niger-Congo groups. We observed that approximately 15% of the protein coding gene associated extreme iHS SNPs of the Ugandan Bantu, DRC, Ivory Coast and Guinea groups were common with the Nilo-Saharan group, whereas Cameroon and Zambian groups had 2.7% in common (Table 3, Additional file 4: Figure S4B). We identified 149 extreme SNPs associated with protein coding genes and were unique to the Uganda Nilo-Saharan (Additional file 6: Table S3). Using the PANTHER Gene ontology database [35], we observed that these unique genes were mainly enriched for cellular and metabolic process proteins (approximately 50.8%) (Additional file 7: Figure S5). Amongst these were SNPs associated with genes that have also been shown by other studies to be under positive selection, including *APOBEC3G*, which is involved in innate anti-viral immunity [36, 37], with demonstrated protective alleles against HIV-1 in Biaka and Mbuti pygmies of Central African Republic and DRC respectively [38]; *IFIH1* (also called *MDA5*), a cytoplasmic RNA receptor that mediates antiviral responses by activating type I interferon signalling [39] but is also implicated in protection against type 1 diabetes ([40, 41]; *OR2L13*, an olfactory receptor involved in activation of signal transduction pathway for odorant recognition and discrimination [42], and is associated with Diabetic nephropathy in African Americans [43].

## ***Nilo-Saharan versus Niger-Congo cross population signatures***

There were 299 SNPs with high  $F_{ST}$  (above 99<sup>th</sup> percentile) and XPEHH ( $R_{sb} -\log p > 3$ ) in the regions of protein coding genes that were also highly differentiated

between the Nilo-Saharan and Niger-Congo populations (Additional file 8: Table S4). We then compared SNP loci with derived alleles that are unique to the Nilo-Saharan Lugbara and occur in highly differentiated genes (extreme  $R_{sb}$ , high  $F_{ST}$ ) between the Nilo-Saharan and Niger-Congo groups. From this we identified 12 genes (Table 5, Additional file 9: Figure S6D) including the *APOBEC3G* gene, that are highly differentiated between the Nilo-Saharan Lugbara and Niger-Congo groups (mean  $F_{ST}$  0.11,  $R_{sb}$   $-\log p = 4.1$ ). *APOBEC3G* also contains the SNP rs112077004, which was observed to be under positive selection in the Nilo-Saharan Lugbara (Figure 4, Additional file 10: Figure S7, Additional file 11: Table S5).

## Discussion

We have analysed the genomes of 289 individuals from seven populations from six Sub-Saharan Africa Countries, investigating their admixture profile, demographic histories and signatures of selection that differentiate the major linguistic groups. The MDS analysis identified five major clusters: Nilo-Saharan, two Niger-Congo A groups from Nigeria and West Africa and two groups of Niger-Congo B (Bantu speakers) from Central and East Africa, which were consistent with previous studies [5, 8, 44]. The samples represented three of the five major linguistic groups in Africa, omitting the Afro-Asiatic and Khoisan speakers. Afro-Asiatic speakers are found across North and North-East Africa in regions adjacent to Nilo-Saharan and Bantu speakers. Afro-Asiatic reference populations were not included in this study and we therefore could not detect any admixture from this source. A SNP genotype based analysis of Nilotic populations indicated that Nilotic populations only contain a trace of Afro-Asiatic ancestry and therefore our observations on East African populations may not be significantly limited by the absence of Afro-Asiatic data [13].

Linguistic analyses suggest that Niger-Congo speaking hunter-gathers originated from the Kordofanian speakers of the Nuba mountains of Sudan and then traversed the Sahel to Mali (Figure 5). They colonised the coast from Senegal to Nigeria and Cameroon over several thousand years, forming multiple linguistic groups. The Bantu (Niger-Congo-B) speaking people emerged as another linguistic group amongst the greater than 60 Niger-Congo-A groups in the Nigeria/Cameroon region about 3,000 years ago. Bantu speaking peoples then spread South-East along savannah corridors through the Congo basin and emerged in the Great Lakes region and spread North to the Lake Victoria region and South down the East Side of Africa[10, 45, 46]. This rapid expansion is believed to have been enabled by the development of agriculture and later enhanced by the acquisition of iron tools [5].

Our admixture analysis at  $K=4$  was consistent with this linguistic history and recent genetic analyses [8, 10] with three African ancestral allele clusters (AAC) which can be interpreted as representing Niger-Congo A languages in West Africa, Niger-Congo B (Bantu) in Central and East Africa and Nilo-Saharan in Northern Uganda. The Niger-Congo-A speakers in extreme West Africa appear to have approximately 10% Nilo-Saharan ancestry and this declines towards the East. On the other hand, the Bantu speakers are a mix of Niger-Congo-A and a distinct putative Bantu ancestral cluster that it at highest frequency in Nigeria and Cameroon, despite the Nigerian Yoruba and Esan not being Bantu languages. The Niger-Congo-A component is displaced by a Nilotic component with easterly latitude whilst the “Bantu” component remains constant. At  $K=5$  a small AAC of 7 Bantu speakers from Zambia emerges, who evidently have a genetic heritage that does not match their self-declared linguistic affiliation, and are of unknown descent. At  $K=6$  a fourth major African AAC appears (green in Figure 2) with strongest representation in the Nigerian Yoruba

and Esan then tapering off east and west into Central and West Africa. This does not correspond to any linguistic group and displaces the Niger-Congo-A ancestry observed at  $K=4$  and 5, to the east of Nigeria and Niger-Congo-B (Bantu) in Nigeria and to the West. This ancestral cluster could represent a secondary movement out of Nigeria of migrants who adopted their host's language. One possible driver for such a migration, if it occurred, was the development of iron smelting which may have originated in Nigeria about 2,500 years ago [47]. Irrespective of the true number of ancestral allele clusters there is evidence of back migration of people with Bantu ancestral alleles into West Africa as has been observed before [44]. Interestingly this migration to the west was not accompanied by language expansion as it was to the east.

Regarding population history, the estimates of current  $N_e$  obtained from our data with MCMS (Figure 3A) of around 200,000 in West and Central Africa and 57,000-125,000 in East Africa (Supplementary Table S6) was consistent with previous observations on other African samples using the same method [48] [12], but our larger dataset provides higher resolution at recent time points than a previous analysis [12]. The faster growth in the Niger-Congo A and B than the Nilotic populations appears to predate the Bantu expansion. The Niger-Congo A population was believed to be expanding through West Africa as the climate became wetter after 10kya, consistent with the separation times between the Guinea and Ivory Coast populations observed on the Cross-Coalescence Plot (Figure 3B). The Nilo-Saharan population developed a pastoralist economy probably after 6kya but their expansion into the tsetse belt may have been delayed by trypanosomiasis and other diseases until the cattle developed tolerance [49-51]. The effective population size did not grow as fast as that of the Niger-Congo-A populations. The brief population decline dated at ~1340CE by

MSMC coincides with the timing of the Black Death (1343-1353), however time resolution is low and the decrease was only observed at a single time point. There is evidence of abandonment of multiple large settlements throughout West Africa around the time of the Black Death and there is speculation that this was caused by the plague [52]. The decrease at this time appears to have impacted the West and Central African Niger-Congo but not the East African populations. Both Bantu and Nilotic populations in East Africa were cattle keepers and pastoralists to varying degrees [51] and the concomitant lower population density and mobile lifestyle may have made them less vulnerable to plague than the more settled and urbanised West Africans. The more recent decline in the Nilotic Lugbara effective population size is unexplained, but the catastrophic Rinderpest outbreak in the 1880's and 1890's that killed up 90% of indigenous cattle, which lead to the depopulation of the East African savannahs and may have ended the dominance of the Nilotic speaking Maasai over the Bantu Kikuyu could have been a contributory factor [53].

The Cross-Coalescence plots for comparison between populations other than the Guinea and Ivory Coast Niger-Congo-A show long periods of separation (not shown). This is not consistent with previous observations [12] or with the Ugandan Bantu populations having separated from Niger-Congo-A populations even more recently than the separation between Guinea and Ivory Coast populations, and is presumably due to the extensive admixture with the Nilotics observed in this population. The Central African cross-coalescence data also indicated older separation times than linguistic evidence suggests (not shown) and although there was less evidence of admixture in this population, these data should be treated with caution.

We identified evidence of selection in genes that have previously been associated with HIV/AIDS, Tuberculosis and Malaria. Given the high prevalence of lethal

infections on the continent [26], the finding of positive natural selection at disease susceptibility loci is not surprising. However not all these genes occurred in all the populations, demonstrating spatially varying selection probably due to differing environmental pressures [54, 55]. We looked for signatures of selection in genes and pathways that are implicated in trypanosome infection, including the calcium signalling pathway [29, 30], the MAPK pathway [31-34], and *HPR*, *APOL1*, *IL6*, *HLAG*, genes [56-61] (Additional file 12: Figure S8, Additional file 13: Table S6). However we only found evidence for selection for the calcium signalling and MAPK pathway genes. This suggests that Trypanosomiasis may have had a selective force in these populations.

In order to determine signatures of selection unique to the Nilo-Saharan Lugbara population, we used a combination of linkage disequilibrium-based method (iHS and  $R_{sb}$ ) and population differentiation based method ( $F_{ST}$ ) [62]. Using this approach we identified 12 loci associated with coding genes, which are unique to the Nilo-Saharan Lugbara and highly differentiated from the Niger-Congo population. Among these was the variant associated with *APOBEC3G* that demonstrated significant positive selection in the Nilo-Saharan Lugbara population. This protein is involved in viral innate immunity [63], by inducing a high rate of dC to dU mutations in the nascent reverse transcripts leading to the degradation of the viral genome [36, 37]. The Lugbara have relatively low prevalence of HIV (4%) in comparison to the Basoga (6.4%) and Baganda (10.7%) Bantu groups of Uganda but relatively high prevalence of Hepatitis B suggesting that either *APOBEC3G* has different effects on each of these viruses [64-69].

We also identified the missense variant rs10930046 (T/C) located in the *IFIH1* CDS, which was unique to the Nilo-Saharan Lugbara and highly selected (iHS  $-\log p$

3.264). This gene is associated with up regulation of type I interferon signalling occurring in a spectrum of human diseases [39] and is believed to be involved in the suppression of Hepatitis B viral replication [70]. Being a non-synonymous variant, rs10930046 could alter the functioning of IFIH1 and thus increase susceptibility to HBV in the Lugbara population, something that could be tested by a candidate gene study for DNA virus infections. Northern Uganda is considered to have one of the highest prevalence of Hepatitis B virus in the world [71] which has perhaps resulted in a unique adaption of the Nilo-Saharan Lugbara population to infection.

## **Conclusion**

We have incorporated a Nilo-Saharan population into the analysis of genomic sequences of Niger-Congo populations for the first time and show extensive admixture between Nilo-Saharan ancestry and Niger-Congo B (Bantu) populations. We show evidence for signatures of selection within the Nilo-Saharan population in genes associated with infectious diseases that have different prevalence from surrounding Bantu (Niger-Congo B) populations.

## **Methods**

### **Sample collection**

The samples used for this study are part of the TrypanoGEN biobank [72], which describes ethics approval, recruitment, sample processing and the meta data collected. The ethical approval for the study was provided by the national ethics councils of the TrypanoGEN consortium countries involved in the sample collection. The sampled populations were assigned a 3 letter code with the following criteria: Country name first letter, was used as the first letter of the code; For countries where

more than one linguistic group was sampled, we used abbreviations of the country name, ZAM-Zambia, CAM-Cameroon, CIV-Ivory Coast, DRC-Democratic republic of Congo; For countries where a homogeneous linguistic group was sampled, we used the Country, language group and language, UNL-Uganda Nilotic Lugbara, UBB-Uganda, Niger-congo B (Bantu), Basoga, GAS-Guinea, Niger-Congo A, Soussou. Peripheral blood was collected from the participants at the field sites, frozen, and transported to reference laboratories from where DNA extraction was carried out using the Whole blood MidiKit (Qiagen). The DNA was quantified using the Qubit (Qiagen) and approximately 1µg was shipped from each country for sequencing at the University of Liverpool, UK except for Cameroon and Zambia whose DNA was shipped to Baylor College, USA.

### **Sequencing and SNP calling**

The whole genome sequencing libraries were prepared using the Illumina Truseq PCR-free kit and sequenced on the Illumina Hiseq2500. The samples from Guinea, Cote D'Ivoire, Uganda and DRC were sequenced to 10x coverage at the Center for Genomic Research at the University of Liverpool. The samples from Zambia and Cameroon were sequenced to 30X at the Baylor College of Medicine Human Genome Sequencing Center.

The sequenced reads were mapped onto the 1000 genomes project human\_g1k\_v37\_decoy reference genome using BWA. The SNP calling on all the samples was done using the genome analysis tool kit GATK v3.4. The SNPs were then filtered by; a) removing loci with > 10% missing SNP, b) removing individuals with > 10% missing SNP loci and c) removing loci with Hardy Weinberg P value < 0.01. In addition, loci with MAF < 0.05 were also removed for the population



stratification and Admixture analysis. Variant annotation was done using snpEff  
([www.snpeff.sourceforge.net](http://www.snpeff.sourceforge.net)).

## **MDS analysis**

Population stratification was done using Multi dimensional scaling tool in Plink 1.9  
and R v 3.2.1 tools. For this analysis, in addition to the filtering mentioned above,  
SNP loci less than 2000bp apart were removed in order to reduce the linkage  
disequilibrium (LD) between adjacent SNP. MDS analysis was carried out for (i) all  
TrypanoGEN data , (ii) all TrypanoGEN data plus African 1000 genome data, (iii) all  
TrypanoGEN data including 50 European and all African 1000 genome data  
excluding African Caribbean in Barbados (ACB) and African Southwest USA (ASW)  
populations.

## **Population Admixture**

The population ancestry of each individual was obtained using Admixture 1.23 [16]  
on the filtered PLINK .bed files on the same TrypanoGEN, one thousand genome  
African and European population data sets analysed by MDS. Admixture was run on  
K1 to K8 with three replicates for each run. The Admixture plots were drawn using  
the R tool ‘strplot’ [73].

## **Genetic diversity: $F_{ST}$**

The genetic diversity due to difference in allele frequency among populations was  
analysed by the inter-population Wright’s  $F_{ST}$  [17] in PLINKv1.9. The  $F_{ST}$  estimates  
were made between TrypanoGEN (UNL, UBB, DRC, CIV, GAS) and one thousand  
genome African (LWK, YRI, ESN, MSL, GWD) populations. The  $F_{ST}$  dendrogram

was generated using Fitch in Phylip3.685 [74]. The geographic distance matrix between populations was calculated based on their global position system (GPS) coordinates [75].

### **Population History.**

Population sizes and divergence times were calculated using MSMC [48] on data phased with Beagle [76]. Since PCA and Admixture analysis had indicated little difference between linguistic groups in each country with the exception of the Ugandan Bantu and Nilotic populations, samples from each country with highest coverage were analysed together except for Uganda where Bantu and Nilotic samples were analysed as separate populations. For population size estimates, output from 3 independent runs each using 8 different haplotypes were combined. Using 8 haplotypes rather than 4 gives higher resolution at more recent time points. For estimates of relative cross coalescence rate, three replicate runs were done, each using 2 different samples (4 haplotypes) from each pairwise comparison between populations. Results presented are the means of the replicates.

### **Signatures of selection**

The estimation of haplotypes was carried out by first Phasing of the genotyped SNPs using SHAPEIT v2.2 software [77]. The extended haplotype homozygosity (EHH) was then analysed using the R software package *rehh* [78]. Two main EHH derived statistics were calculated from the phased haplotype data, that is, intra-population integrated haplotype Score (iHS) [19] and inter-population  $R_{sb}$  [79]. Bedtools v2.26.0 was used to identify the intersection of the iHS,  $F_{st}$  and  $R_{sb}$  loci.

## **Declarations**

## **Ethical approval**

The ethical approval for the study was provided by the national ethics councils of the TrypanoGEN consortium countries involved in the sample collection which are: Uganda (HS 1344), Zambia (011-09-13), Democratic Republic of Congo (No 1/2013), Cameroon (2013/364/L/CNERSH/SP), Cote d'Ivoire (2014/No 38/MSLS/CNER-dkn), and Guinea (1-22/04/2013). All the participants in the study were guided through the consent forms, and written consent was obtained to collect biological specimens.

## **Consent of publication**

Informed consent was provided by the study participants, for sharing and publishing their anonymised data.

## **Availability of data and material**

The datasets generated and/or analysed during the current study are available from the corresponding author on reasonable request. The sequenced data will be submitted to the EGA by H3ABionet under the study accession number EGAS00001002602.

## **Competing interests**

The authors declare that they have no competing interests.

## **Funding**

The study was under the TrypanoGEN project, funded by the Wellcome Trust (099310/Z/12/Z). The funders had no roles in the design of the study and collection, analysis, and interpretation of data and in writing the manuscript.

#### **Author's contributions**

EM, AM, IS, BB, CHZ conceived the study; HI, MK, DM, GS, JE, JC, MS, PA, collected samples; JM and HN analysed the data, interpreted output and wrote the manuscript; All authors read and approved the final manuscript.

#### **Acknowledgements**

The authors would like to acknowledge the study participants who donated their specimens, the personnel involved in the community engagement and coordinating sample collection and processing, the National sleeping sickness control programmes of the participating Countries. Z Lombard (University of Witwatersrand) and D Adeyemo (NHGRI) for facilitating sequencing of samples from Zambia and Cameroon at Baylor College of Medicine. The H3ABionet for training and support on data analysis. Also Fiona Marshall and Rebecca Grollemund for helpful discussions of African History.

#### **Authors' Affiliations**

1. Makerere University, Kampala, Uganda
2. Centre for Genomic Research, University of Liverpool, UK
3. Centre International de Recherche-Développement sur l'Élevage en zone Subhumide (CIRDES), Bobo-Dioulasso, Burkina Faso
4. Université Jean Lorougnon Guédé (UJLoG), Daloa, Côte d'Ivoire

5. Institut National de Recherche Biomedicale, Kinshasa, Democratic Republic of Congo
6. Faculty of Science, University of Dschang, Cameroon
7. University of Malawi, College of Medicine, Department of Basic Medical Sciences, Blantyre, Malawi
8. Department of Disease Control, School of Veterinary Medicine, University of Zambia, Lusaka, Zambia
9. Institut de Recherche pour le Développement (IRD), IRD-CIRAD 177, Montpellier, France
10. Wellcome Center for Molecular Parasitology, University Place, Glasgow, UK
11. Programme National de Lutte contre la Trypanosomose Humaine Africaine, Conakry, Guinea

## References:

1. *TRYPANOGEN: an H3 Africa Funded Project* [<http://www.trypanogen.net>]
2. Blench R: *Archaeology, Language, and the African Past*. Rowman Altamira; 2006.
3. Greenberg J: *Greenberg: the Languages of Africa (International... - Google Scholar*. Bloomington; 1963.
4. Lewis MP, Simons GF, Fennig CD: *Ethnologue: Languages of the World, 16th Edition* | SIL International. 2009.
5. Tishkoff SA, Reed FA, Friedlaender FR, Ehret C, Ranciaro A, Froment A, Hirbo JB, Awomoyi AA, Bodo J-M, Doumbo O, Ibrahim M, Juma AT, Kotze MJ, Lema G, Moore JH, Mortensen H, Nyambo TB, Omar SA, Powell K, Pretorius GS, Smith MW, Thera MA, Wambebe C, Weber JL, Williams SM: **The genetic structure and history of Africans and African Americans**. *Science* 2009, **324**:1035–1044.
6. Bryc K, Auton A, Nelson MR, Oksenberg JR, Hauser SL, Williams S, Froment A, Bodo J-M, Wambebe C, Tishkoff SA, Bustamante CD: **Genome-wide patterns of population structure and admixture in West Africans and African Americans**. *Proc Natl Acad Sci USA* 2010, **107**:786–791.

- 530 7. Tishkoff SA, Williams SM: **Genetic analysis of African populations: human**  
531 **evolution and complex disease.** *Nat Rev Genet* 2002, **3**:611–621.
- 532 8. Gurdasani D, Carstensen T, Tekola-Ayele F, Pagani L, Tachmazidou I,  
533 Hatzikotoulas K, Karthikeyan S, Iles L, Pollard MO, Choudhury A, Ritchie GRS, Xue  
534 Y, Asimit J, Nsubuga RN, Young EH, Pomilla C, Kivinen K, Rockett K, Kamali A,  
535 Doumatey AP, Asiki G, Seeley J, Sisay-Joof F, Jallow M, Tollman S, Mekonnen E,  
536 Ekong R, Oljira T, Bradman N, Bojang K, et al.: **The African Genome Variation**  
537 **Project shapes medical genetics in Africa.** *Nature* 2014, **517**:327–332.
- 538 9. Busby G, Band G, Si Le Q, Jallow M, Bougama E, Mangano V, Amenga-Etego L,  
539 Emil A, Apinjoh T, Ndila C, Manjurano A, Nyirongo V, Doumbo O, Rockett K,  
540 Kwiatkowski D, Spencer C, The Malaria Genomic Epidemiology Network:  
541 *Admixture Into and Within Sub-Saharan Africa.* 2016.
- 542 10. Patin E, Lopez M, Grollemund R, Verdu P, Harmant C, Quach H, Laval G, Perry  
543 GH, Barreiro LB, Froment A, Heyer E, Massougboji A, Fortes-Lima C, Migot-  
544 Nabias F, Bellis G, Dugoujon J-M, Pereira JB, Fernandes V, Pereira L, Van der Veen  
545 L, Mouguiama-Daouda P, Bustamante CD, Hombert J-M, Quintana-Murci L:  
546 **Dispersals and genetic adaptation of Bantu-speaking populations in Africa and**  
547 **North America.** *Science* 2017, **356**:543–546.
- 548 11. Ratan A, Perry GH, Montenegro A, Miller W, Kim HL, Schuster SC: **Khoisan**  
549 **hunter-gatherers have been the largest population throughout most of modern-**  
550 **human demographic history.** *Nat Commun* 2014, **5**:1–8.
- 551 12. Mallick S, Li H, Lipson M, Mathieson I, Gymrek M, Racimo F, Zhao M,  
552 Chennagiri N, Nordenfelt S, Tandon A, Skoglund P, Lazaridis I, Sankararaman S, Fu  
553 Q, Rohland N, Renaud G, Erlich Y, Willems T, Gallo C, Spence JP, Song YS, Poletti  
554 G, Balloux F, van Driem G, de Knijff P, Romero IG, Jha AR, Behar DM, Bravi CM,  
555 Capelli C, et al.: **The Simons Genome Diversity Project: 300 genomes from 142**  
556 **diverse populations.** *Nature* 2016, **538**:201–206.
- 557 13. Dobon B, Hassan HY, Laayouni H, Luisi P, Ricaño-Ponce I, Zhernakova A,  
558 Wijmenga C, Tahir H, Comas D, Netea MG, Bertranpetit J: **The genetics of East**  
559 **African populations: a Nilo-Saharan component in the African genetic**  
560 **landscape.** *Sci Rep* 2015, **5**:9996.
- 561 14. DePristo MA, Banks E, Poplin R, Garimella KV, Maguire JR, Hartl C,  
562 Philippakis AA, del Angel G, Rivas MA, Hanna M, McKenna A, Fennell TJ,  
563 Kernysky AM, Sivachenko AY, Cibulskis K, Gabriel SB, Altshuler D, Daly MJ: **A**  
564 **framework for variation discovery and genotyping using next-generation DNA**  
565 **sequencing data.** *Nat Genet* 2011, **43**:491–498.
- 566 15. Wang J, Raskin L, Samuels DC, Shyr Y, Guo Y: **Genome measures used for**  
567 **quality control are dependent on gene function and ancestry.** *Bioinformatics*  
568 2015, **31**:318–323.
- 569 16. Alexander DH, Novembre J, Lange K: **Fast model-based estimation of ancestry**  
570 **in unrelated individuals.** *Genome Res* 2009.

- 571 17. Wright S: **The Genetical Structure Of Populations.** *Annals of Human Genetics*  
572 1949, **15**:323–354.
- 573 18. Sabeti PC, Reich DE, Higgins JM, Levine HZP, Richter DJ, Schaffner SF, Gabriel  
574 SB, Platko JV, Patterson NJ, McDonald GJ, Ackerman HC, Campbell SJ, Altshuler  
575 D, Cooper R, Kwiatkowski D, Ward R, Lander ES: **Detecting recent positive**  
576 **selection in the human genome from haplotype structure.** *Nature* 2002, **419**:832–  
577 837.
- 578 19. Voight BF, Kudaravalli S, Wen X, Pritchard JK: **A Map of Recent Positive**  
579 **Selection in the Human Genome.** *PLoS Biol* 2006, **4**:e72.
- 580 20. Sabeti PC, Varilly P, Fry B, Lohmueller J, Hostetter E, Cotsapas C, Xie X, Byrne  
581 EH, McCarroll SA, Gaudet R, Schaffner SF, Lander ES, Frazer KA, Ballinger DG,  
582 Cox DR, Hinds DA, Stuve LL, Gibbs RA, Belmont JW, Boudreau A, Hardenbol P,  
583 Leal SM, Pasternak S, Wheeler DA, Willis TD, Yu F, Yang H, Zeng C, Gao Y, Hu H,  
584 et al.: **Genome-wide detection and characterization of positive selection in human**  
585 **populations.** *Nature* 2007, **449**:913–918.
- 586 21. Yoo BC, Cairns N, Fountoulakis M, Lubec G: **Synaptosomal proteins, beta-**  
587 **soluble N-ethylmaleimide-sensitive factor attachment protein (beta-SNAP),**  
588 **gamma-SNAP and synaptotagmin I in brain of patients with Down syndrome**  
589 **and Alzheimer's disease.** *Dement Geriatr Cogn Disord* 2001, **12**:219–225.
- 590 22. Andersen KG, Shylakhter I, Tabrizi S, Grossman SR, Happi CT, Sabeti PC:  
591 **Genome-wide scans provide evidence for positive selection of genes implicated in**  
592 **Lassa fever.** *Philos Trans R Soc Lond, B, Biol Sci* 2012, **367**:868–877.
- 593 23. Bond J, Roberts E, Springell K, Lizarraga SB, Lizarraga S, Scott S, Higgins J,  
594 Hampshire DJ, Morrison EE, Leal GF, Silva EO, Costa SMR, Baralle D, Raponi M,  
595 Karbani G, Rashid Y, Jafri H, Bennett C, Corry P, Walsh CA, Woods CG: **A**  
596 **centrosomal mechanism involving CDK5RAP2 and CENPJ controls brain size.**  
597 *Nat Genet* 2005, **37**:353–355.
- 598 24. Crocker PR, Paulson JC, Varki A: **Siglecs and their roles in the immune system**  
599 **- ProQuest.** ... *reviews Immunology* 2007.
- 600 25. Huang DW, Sherman BT, Lempicki RA: **Systematic and integrative analysis of**  
601 **large gene lists using DAVID bioinformatics resources.** *Nat Protoc* 2009, **4**:44–57.
- 602 26. Bhutta ZA, Sommerfeld J, Lassi ZS, Salam RA, Das JK: **Global burden,**  
603 **distribution, and interventions for infectious diseases of poverty.** *Infect Dis*  
604 *Poverty* 2014, **3**:21.
- 605 27. *KEGG: Kyoto Encyclopedia of Genes and Genomes* [<http://www.kegg.jp/kegg/>]
- 606 28. Kanehisa M, Sato Y, Kawashima M, Furumichi M, Tanabe M: **KEGG as a**  
607 **reference resource for gene and protein annotation.** *Nucleic Acids Res* 2016,  
608 **44**:D457–62.
- 609 29. Grab DJ, Garcia-Garcia JC, Nikolskaia OV, Kim YV, Brown A, Pardo CA, Zhang  
610 Y, Becker KG, Wilson BA, de A Lima APC, Scharfstein J, Dumler JS: **Protease**



- 611 **activated receptor signaling is required for African trypanosome traversal of**  
612 **human brain microvascular endothelial cells.** *PLoS Negl Trop Dis* 2009, **3**:e479.
- 613 30. Nikolskaia OV, de A Lima APC, Kim YV, Lonsdale-Eccles JD, Fukuma T,  
614 Scharfstein J, Grab DJ: **Blood-brain barrier traversal by African trypanosomes**  
615 **requires calcium signaling induced by parasite cysteine protease.** *J Clin Invest*  
616 2006, **116**:2739–2747.
- 617 31. Soares-Silva M, Diniz FF, Gomes GN, Bahia D: **The Mitogen-Activated Protein**  
618 **Kinase (MAPK) Pathway: Role in Immune Evasion by Trypanosomatids.** *Front*  
619 *Microbiol* 2016, **7**:183.
- 620 32. Mansfield JM, Paulnock DM: **Regulation of innate and acquired immunity in**  
621 **African trypanosomiasis.** *Parasite Immunol* 2005, **27**:361–371.
- 622 33. Noyes H, Brass A, Obara I, Anderson S, Archibald AL, Bradley DG, Fisher P,  
623 Freeman A, Gibson J, Gicheru M, Hall L, Hanotte O, Hulme H, McKeever D, Murray  
624 C, Oh SJ, Tate C, Smith K, Tapio M, Wambugu J, Williams DJ, Agaba M, Kemp SJ:  
625 **Genetic and expression analysis of cattle identifies candidate genes in pathways**  
626 **responding to Trypanosoma congolense infection.** *Proc Natl Acad Sci USA* 2011,  
627 **108**:9304–9309.
- 628 34. Kuriakose SM, Singh R, Uzonna JE: **Host Intracellular Signaling Events and**  
629 **Pro-inflammatory Cytokine Production in African Trypanosomiasis.** *Front*  
630 *Immunol* 2016, **7**:181.
- 631 35. Thomas PD, Kejariwal A, Campbell MJ, Mi H, Diemer K, Guo N, Ladunga I,  
632 Ulitsky-Lazareva B, Muruganujan A, Rabkin S, Vandergriff JA, Doremiex O:  
633 **PANTHER: a browsable database of gene products organized by biological**  
634 **function, using curated protein family and subfamily classification.** *Nucleic Acids*  
635 *Res* 2003, **31**:334–341.
- 636 36. Sawyer SL, Emerman M, Malik HS: **Ancient adaptive evolution of the primate**  
637 **antiviral DNA-editing enzyme APOBEC3G.** *PLoS Biol* 2004, **2**:E275.
- 638 37. Zhang J, Webb DM: **Rapid evolution of primate antiviral enzyme**  
639 **APOBEC3G.** *Hum Mol Genet* 2004, **13**:1785–1791.
- 640 38. Zhao K, Ishida Y, Oleksyk TK, Winkler CA, Roca AL: **Evidence for selection at**  
641 **HIV host susceptibility genes in a West Central African human population.** *BMC*  
642 *Evol Biol* 2012, **12**:237.
- 643 39. Rice GI, del Toro Duany Y, Jenkinson EM, Forte GMA, Anderson BH, Ariaudo  
644 G, Bader-Meunier B, Baidam EM, Battini R, Beresford MW, Casarano M,  
645 Chouchane M, Cimaz R, Collins AE, Cordeiro NJV, Dale RC, Davidson JE, De  
646 Waele L, Desguerre I, Faivre L, Fazzi E, Isidor B, Lagae L, Latchman AR, Lebon P,  
647 Li C, Livingston JH, Lourenço CM, Mancardi MM, Masurel-Paulet A, et al.: **Gain-**  
648 **of-function mutations in IFIH1 cause a spectrum of human disease phenotypes**  
649 **associated with upregulated type I interferon signaling.** *Nat Genet* 2014, **46**:503–  
650 509.
- 651 40. Nejentsev S, Walker N, Riches D, Egholm M, Todd JA: **Rare variants of IFIH1,**



- 652 **a gene implicated in antiviral responses, protect against type 1 diabetes.** *Science*  
653 2009, **324**:387–389.
- 654 41. Fumagalli M, Cagliani R, Riva S, Pozzoli U, Biasin M, Piacentini L, Comi GP,  
655 Bresolin N, Clerici M, Sironi M: **Population genetics of IFIH1: ancient population**  
656 **structure, local selection, and implications for susceptibility to type 1 diabetes.**  
657 *Molecular Biology and Evolution* 2010, **27**:2555–2566.
- 658 42. Sharon D, Glusman G, Pilpel Y, Khen M, Gruetzner F, Haaf T, Lancet D:  
659 **Primate evolution of an olfactory receptor cluster: diversification by gene**  
660 **conversion and recent emergence of pseudogenes.** *Genomics* 1999, **61**:24–36.
- 661 43. Bailey JNC, Palmer ND, Ng MCY, Bonomo JA, Hicks PJ, Hester JM, Langefeld  
662 CD, Freedman BI, Bowden DW: **Analysis of coding variants identified from exome**  
663 **sequencing resources for association with diabetic and non-diabetic nephropathy**  
664 **in African Americans.** *Hum Genet* 2014, **133**:769–779.
- 665 44. Gomez F, Hirbo J, Tishkoff SA: **Genetic Variation and Adaptation in Africa:**  
666 **Implications for Human Evolution and Disease.** *Cold Spring Harbor Perspectives*  
667 *in Biology* 2014, **6**:a008524–a008524.
- 668 45. Skoglund P, Thompson JC, Prendergast ME, Mitnik A, Sirak K, Hajdinjak M,  
669 Salie T, Rohland N, Mallick S, Peltzer A, Heinze A, Olalde I, Ferry M, Harney E,  
670 Michel M, Stewardson K, Cerezo-Román JI, Chiumia C, Crowther A, Goman-  
671 Chindebvu E, Gidna AO, Grillo KM, Helenius IT, Hellenthal G, Helm R, Horton M,  
672 López S, Mabulla AZP, Parkington J, Shipton C, et al.: **Reconstructing Prehistoric**  
673 **African Population Structure.** *Cell* 2017, **171**:59–71.e21.
- 674 46. Grollemund R, Branford S, Bostoen K: **Bantu expansion shows that habitat**  
675 **alters the route and pace of human dispersals.** 2015.
- 676 47. Vansina J: **Linguistic evidence for the introduction of ironworking into**  
677 **Bantu-Speaking Africa.** *History in Africa* 2006.
- 678 48. Schiffels S, Durbin R: **Inferring human population size and separation history**  
679 **from multiple genome sequences.** *Nat Genet* 2014, **46**:919–925.
- 680 49. Gifford-Gonzalez D: **Animal Disease Challenges to the Emergence of**  
681 **Pastoralism in Sub-Saharan Africa.** *African Archaeological Review* 2000, **17**:95–  
682 139.
- 683 50. Smetko A, Soudré A, Silbermayr K, Müller S, Brem G, Hanotte O, Boettcher PJ,  
684 Stella A, Mészáros G, Wurzinger M, Curik I, Müller M, Burgstaller J, Sölkner J:  
685 **Trypanosomosis: potential driver of selection in African cattle.** *Front Gene* 2015,  
686 **6**:137.
- 687 51. Chritz KL, Marshall FB, Zagal ME, Kirera F, Cerling TE: **Environments and**  
688 **trypanosomiasis risks for early herders in the later Holocene of the Lake**  
689 **Victoria basin, Kenya.** *Proc Natl Acad Sci USA* 2015:201423953.
- 690 52. Chouin GLF: **Fossés, enceintes et peste noire en Afrique de l'Ouest forestière**  
691 **(500-1500 AD). Réflexions sous canopée.** <http://aaarevues.org> 2013:43–66.

- 692 53. Mack R: **The great African cattle plague epidemic of the 1890's.** *Tropical*  
693 *Animal Health and Production* 1970.
- 694 54. Gillespie JH: *The Causes of Molecular Evolution*. Newyork: Oxford Univ. Press;  
695 New York; 1994.
- 696 55. Thorne JL, Kishino H, Painter IS: **Estimating the rate of evolution of the rate of**  
697 **molecular evolution.** *Molecular Biology and Evolution* 1998, **15**:1647–1657.
- 698 56. Hardwick RJ, Ménard A, Sironi M, Milet J, Garcia A, Sese C, Yang F, Fu B,  
699 Courtin D, Hollox EJ: **Haptoglobin (HP) and Haptoglobin-related protein (HPR)**  
700 **copy number variation, natural selection, and trypanosomiasis.** *Hum Genet* 2013.
- 701 57. Pays E, Vanhollebeke B, Uzureau P, Lecordier L, Perez-Morga D: **The molecular**  
702 **arms race between African trypanosomes and humans.** *Nat Rev Microbiol* 2014,  
703 **12**:575–584.
- 704 58. Genovese G, Friedman DJ, Ross MD, Lecordier L, Uzureau P, Freedman BI,  
705 Bowden DW, Langefeld CD, Oleksyk TK, Uscinski Knob AL, Bernhardt AJ, Hicks  
706 PJ, Nelson GW, Vanhollebeke B, Winkler CA, Kopp JB, Pays E, Pollak MR:  
707 **Association of trypanolytic ApoL1 variants with kidney disease in African**  
708 **Americans.** *Science* 2010, **329**:841–845.
- 709 59. Cooper A, Ilboudo H, Alibu VP, Ravel S, Enyaru J, Weir W, Noyes H, Capewell  
710 P, Camara M, Milet J, Jamonneau V, Camara O, Matovu E, Bucheton B, Macleod A:  
711 **APOL1 renal risk variants have contrasting resistance and susceptibility**  
712 **associations with African trypanosomiasis.** *Elife* 2017, **6**.
- 713 60. Courtin D, Milet J, Sabbagh A, Massaro JD, Castelli EC, Jamonneau V, Bucheton  
714 B, Sese C, Favier B, Rouas-Freiss N, Moreau P, Donadi EA, Garcia A: **HLA-G 3'**  
715 **UTR-2 haplotype is associated with Human African trypanosomiasis**  
716 **susceptibility.** *Infect Genet Evol* 2013.
- 717 61. Courtin D, Milet J, Jamonneau V, Yeminanga CS, Kumeso VKB, Bilengue  
718 CMM, Betard C, Garcia A: **Association between human African trypanosomiasis**  
719 **and the IL6 gene in a Congolese population.** *Infect Genet Evol* 2007, **7**:60–68.
- 720 62. Vitti JJ, Grossman SR, Sabeti PC: **Detecting Natural Selection in Genomic**  
721 **Data.** *Annu Rev Genet* 2013, **47**:97–120.
- 722 63. Mangeat B, Turelli P, Caron G, Friedli M, Perrin L, Trono D: **Broad**  
723 **antiretroviral defence by human APOBEC3G through lethal editing of nascent**  
724 **reverse transcripts.** *Nature* 2003, **424**:99–103.
- 725 64. Ministry of Health Uganda, ICF, CDC, USAID, WHO: *Uganda AIDS Indicator*  
726 *Survey (AIS)*. AIDS Indicator Survey (AIS); 2011.
- 727 65. Stopak K, de Noronha C, Yonemoto W, Greene WC: **HIV-1 Vif blocks the**  
728 **antiviral activity of APOBEC3G by impairing both its translation and**  
729 **intracellular stability.** *Mol Cell* 2003, **12**:591–601.
- 730 66. Sheehy AM, Gaddis NC, Malim MH: **The antiretroviral enzyme APOBEC3G**

- 731 **is degraded by the proteasome in response to HIV-1 Vif.** *Nat Med* 2003, **9**:1404–  
732 1407.
- 733 67. Bwogi J, Braka F, Makumbi I, Mishra V, Bakamutumaho B, Nanyunja M, Opio  
734 A, Downing R, Biryahwaho B, Lewis RF: **Hepatitis B infection is highly endemic**  
735 **in Uganda: findings from a national serosurvey.** *Afr Health Sci* 2009, **9**:98–108.
- 736 68. Ochola E, Ocama P, Orach CG, Nankinga ZK, Kalyango JN, McFarland W,  
737 Karamagi C: **High burden of hepatitis B infection in Northern Uganda: results of**  
738 **a population-based survey.** *BMC Public Health* 2013, **13**:727.
- 739 69. Chen R, Zhao X, Wang Y, Xie Y, Liu J: **Hepatitis B virus X protein is capable**  
740 **of down-regulating protein level of host antiviral protein APOBEC3G.** *Sci Rep*  
741 2017, **7**:40783.
- 742 70. Lu H-L, Liao F: **Melanoma differentiation-associated gene 5 senses hepatitis B**  
743 **virus and activates innate immune signaling to suppress virus replication.** *J*  
744 *Immunol* 2013, **191**:3264–3276.
- 745 71. Teshale EH, Kamili S, Drobeniuc J, Denniston M, Bakamutamaho B, Downing R:  
746 **Hepatitis B virus infection in northern Uganda: Impact of pentavalent hepatitis**  
747 **B vaccination.** *Vaccine* 2015, **33**:6161–6163.
- 748 72. Ilboudo H, Noyes H, Mulindwa J, Kimuda MP, Koffi M, Kaboré JW, Ahouty B,  
749 Ngoyi DM, Fataki O, Simo G, Ofon E, Enyaru J, Chisi J, Kamoto K, Simuunza M,  
750 Alibu VP, Lejon V, Jamonneau V, Macleod A, Camara M, Bucheton B, Hertz-Fowler  
751 C, Sidibe I, Matovu E, TrypanoGEN Research Group as members of The H3Africa  
752 Consortium: **Introducing the TrypanoGEN biobank: A valuable resource for the**  
753 **elimination of human African trypanosomiasis.** *PLoS Negl Trop Dis* 2017,  
754 **11**:e0005438.
- 755 73. Ramasamy RK, Ramasamy S, Bindroo BB, Naik VG: **STRUCTURE PLOT: a**  
756 **program for drawing elegant STRUCTURE bar plots in user friendly interface.**  
757 *Springerplus* 2014, **3**:431.
- 758 74. Felsenstein J: **{PHYMLIP}: phylogenetic inference package, version 3.5c. (1993)**  
759 1993.
- 760 75. Ersts PJ: *Geographic Distance Matrix Generator (Version 1.2.3).* *American*  
761 *Museum of Natural History.* Center for Biodiversity and Conservation; 2011.
- 762 76. Williams AL, Patterson N, Glessner J: **Phasing of Many Thousands of**  
763 **Genotyped Samples - ScienceDirect.** *The American Journal of ...* 2012.
- 764 77. Delaneau O, Zagury J-F, Marchini J: **Improved whole-chromosome phasing for**  
765 **disease and population genetic studies.** *Nat Meth* 2013, **10**:5–6.
- 766 78. Gautier M, Vitalis R: **rehh: an R package to detect footprints of selection in**  
767 **genome-wide SNP data from haplotype structure.** *Bioinformatics* 2012, **28**:1176–  
768 1177.
- 769 79. Tang K, Thornton KR, Stoneking M: **A new approach for using genome scans**

- 770 **to detect recent positive selection in the human genome. *PLoS Biol* 2007, 5:e171.**
- 771 80. *Ethnologue: Languages of the World* [<https://www.ethnologue.com>]
- 772 81. Ranasinghe S, Cutler S, Davis I, Lu R, Soghoian DZ, Qi Y, Sidney J, Kranias G,  
773 Flanders MD, Lindqvist M, Kuhl B, Alter G, Deeks SG, Walker BD, Gao X, Sette A,  
774 Carrington M, Streeck H: **Association of HLA-DRB1-restricted CD4<sup>+</sup> T cell**  
775 **responses with HIV immune control. *Nat Med* 2013, 19:930–933.**
- 776 82. Hill AV, Allsopp CE, Kwiatkowski D, Anstey NM, Twumasi P, Rowe PA,  
777 Bennett S, Brewster D, McMichael AJ, Greenwood BM: **Common west African**  
778 **HLA antigens are associated with protection from severe malaria. *Nature* 1991,**  
779 **352:595–600.**
- 780 83. Pontillo A, Brandão LA, Guimarães RL, Segat L, Athanasakis E, Crovella S: **A**  
781 **3'UTR SNP in NLRP3 gene is associated with susceptibility to HIV-1 infection. *J***  
782 ***Acquir Immune Defic Syndr* 2010, 54:236–240.**
- 783 84. Zhang S, Feng Y, Narayan O, Zhao LJ: **Cytoplasmic retention of HIV-1**  
784 **regulatory protein Vpr by protein-protein interaction with a novel human**  
785 **cytoplasmic protein VprBP. *Gene* 2001, 263:131–140.**
- 786 85. Deng J, Chen Y, Ding D, Lu P, Yang X, Song Z, Zhu H: **TRIM5α H43Y**  
787 **Polymorphism and Susceptibility to HIV-1 Infection: A Meta-Analysis. *AIDS Res***  
788 ***Hum Retroviruses* 2015, 31:1213–1218.**
- 789 86. Meyerson NR, Rowley PA, Swan CH, Le DT, Wilkerson GK, Sawyer SL:  
790 **Positive selection of primate genes that promote HIV-1 replication. *Virology***  
791 **2014, 454-455:291–298.**
- 792 87. Louie LG, Hartogensis WE, Jackman RP, Schultz KA, Zijenah LS, Yiu CH-Y,  
793 Nguyen VD, Sohsman MY, Katzenstein DK, Mason PR: **Mycobacterium**  
794 **tuberculosis/HIV-1 coinfection and disease: role of human leukocyte antigen**  
795 **variation. *J Infect Dis* 2004, 189:1084–1090.**
- 796 88. Taniguchi M, Kawabata M: **KIR3DL1/S1 genotypes and KIR2DS4 allelic**  
797 **variants in the AB KIR genotypes are associated with Plasmodium-positive**  
798 **individuals in malaria infection. *Immunogenetics* 2009, 61:717–730.**
- 799 89. Norman PJ, Hollenbach JA, Nemat-Gorgani N, Guethlein LA, Hilton HG, Pando  
800 MJ, Koram KA, Riley EM, Abi-Rached L, Parham P: **Co-evolution of human**  
801 **leukocyte antigen (HLA) class I ligands with killer-cell immunoglobulin-like**  
802 **receptors (KIR) in a genetically diverse population of sub-Saharan Africans.**  
803 ***PLoS Genet* 2013, 9:e1003938.**
- 804 90. Hsieh F-L, Turner L, Bolla JR, Robinson CV, Lavstsen T, Higgins MK: **The**  
805 **structural basis for CD36 binding by the malaria parasite. *Nat Commun* 2016,**  
806 **7:12837.**
- 807 91. Manjurano A, Sepúlveda N, Nadjm B, Mtove G, Wangai H, Maxwell C, Olomi R,  
808 Reyburn H, Drakeley CJ, Riley EM, Clark TG, in Collaboration With MalariaGEN:  
809 **USP38, FREM3, SDC1, DDC, and LOC727982 Gene Polymorphisms and**

810 **Differential Susceptibility to Severe Malaria in Tanzania.** *J Infect Dis* 2015,  
811 **212:**1129–1139.

812 92. Patrinos GP, Kolia P, Papadakis MN: **Molecular diagnosis of inherited**  
813 **disorders: lessons from hemoglobinopathies.** *Hum Mutat* 2005, **26:**399–412.

814 93. Maiga B, Dolo A, Touré O, Dara V, Tapily A, Campino S, Sepúlveda N, Risley P,  
815 Silva N, Silva N, Corran P, Rockett KA, Kwiatkowski D, MalariaGEN Consortium,  
816 Clark TG, Troye-Blomberg M, Doumbo OK: **Human candidate polymorphisms in**  
817 **sympatric ethnic groups differing in malaria susceptibility in Mali.** *PLoS ONE*  
818 2013, **8:**e75675.

819 94. *Africa During the Last 150,000 Years*  
820 [<http://www.esd.ornl.gov/projects/gen/nercAFRICA.html>]

821 95. Greenberg JH: *Greenberg: the Languages of Africa - Google Scholar.* 1966.

822

823

824

825

826

827

828

829

830

831

832

833

834

835

836

837

838

839

840

841

842

## Tables

**Table 1.** Table showing the Ethnic groups and number of individual from each Country that were used for Whole genome sequencing. The Ethnicity codes were obtained from the Ethnologue languages of the World catalogue [80].

| Country     | Code | Ethnicity     | Ethnologue code | No. of Samples |
|-------------|------|---------------|-----------------|----------------|
| Uganda      | UNL  | Lugbara       | lgg             | 50             |
|             | UBB  | Basoga        | xog             | 33             |
| Zambia      | ZAM  | Soli/Chikunda | sby; kdn        | 28             |
|             |      | Tumbuka       | tum             | 14             |
|             |      | Bemba         | bem             | 8              |
| Congo       | DRC  | Kimbala       | mdp             | 20             |
|             |      | Kingongo      | noq             | 30             |
| Cameroon    | CAM  | Bamilike      | fmp             | 6              |
|             |      | Mundani       | mnf             | 8              |
|             |      | Ngoumba       | nmg             | 12             |
| Ivory Coast | CIV  | Baoule        | bci             | 11             |
|             |      | Gouro         | goa             | 21             |
|             |      | More          | Moa             | 12             |
|             |      | Senoufo       | sef             | 4              |
|             |      | Malinke       | loi             | 1              |
|             |      | Koyaka        | kg              | 1              |
| Guinea      | GAS  | Soussou       | sus             | 50             |

**Table 2.** The number of SNPs and Indels obtained from the mapping and variant calling pipeline. The SNPs were filtered for HWE, MAF and missing genotypes

| Pop          | Samples (WGS) | Samples after filtering | SNPs before filtering | SNPs after filtering | Indels before filtering | Indels after filtering |
|--------------|---------------|-------------------------|-----------------------|----------------------|-------------------------|------------------------|
| CIV          | 50            | 50                      | 18,780,913            | 16,066,827           | 3,069,408               | 1,583,594              |
| DRC          | 50            | 49                      | 19,188,537            | 16,449,696           | 3,146,802               | 1,626,826              |
| GAS          | 50            | 47                      | 18,831,834            | 16,075,002           | 3,063,080               | 1,579,352              |
| UBB          | 33            | 32                      | 17,671,306            | 14,987,699           | 2,889,915               | 1,426,646              |
| UNL          | 50            | 44                      | 18,986,243            | 15,598,629           | 3,130,979               | 1,536,490              |
| CAM*         | 26            | 26                      | 17,183,994            | 14,579,603           | 3,283,543               | 1,539,459              |
| ZAM*         | 41            | 41                      | 18,232,386            | 15,548,110           | 3,448,501               | 1,651,467              |
| <b>Total</b> | <b>300</b>    | <b>289</b>              | <b>34,116,333</b>     | <b>30,591,165</b>    | <b>5,336,622</b>        | <b>3,166,196</b>       |

\* Samples Sequenced at 30X coverage, rest of the samples were at 10X coverage.  
Identified 2,023,049 SNPS without rsIDs {Total SNPs (30,591,165) – SNPs with rsIDs (28,568,116)}

**Table 3.** Extreme iHS loci that overlap with the UNL population

| Pop | Extreme iHS SNPs ( $-\log p > 3.0$ ) | Extreme iHS SNPS associated with protein coding genes | Extreme iHS SNPs overlapping with UNL |
|-----|--------------------------------------|-------------------------------------------------------|---------------------------------------|
| UNL | 8454                                 | 2613                                                  | 2613                                  |
| UBB | 9617                                 | 3326                                                  | 512                                   |
| DRC | 10037                                | 3790                                                  | 535                                   |
| ZAM | 5570                                 | 1990                                                  | 86                                    |
| CIV | 10129                                | 3541                                                  | 534                                   |
| CAM | 7686                                 | 2597                                                  | 82                                    |
| GAS | 11401                                | 3741                                                  | 382                                   |

863 **Table 4.** DAVID [25] analysis of Genes that are highly selected within TrypanoGEN population and associated with HIV, Tuberculosis, and  
864 Malaria. The Fisher's exact test *P*-values indicate significant gene enrichment in the associated disease

865

| Gene            | Chr      | Populations affected    | Associated Disease | p value  | Reference |
|-----------------|----------|-------------------------|--------------------|----------|-----------|
| <i>HLA-DRB1</i> | 6p21.32  | ZAM, CAM, CIV, DRC, UBB | HIV/TB/Malaria     | 1.63E-09 | [81, 82]  |
| <i>NLRP1</i>    | 17p13.2  | ZAM, CIV, DRC, GAS, UBB | HIV                | 2.42E-07 | [83]      |
| <i>VPRBP</i>    | 3p10.6   | UBB, CIV, DRC, GAS      | HIV                | 2.42E-07 | [84]      |
| <i>TRIM5</i>    | 11p15.4  | UNL, CAM, GAS           | HIV                | 7.30E-07 | [85]      |
| <i>ANKRD30A</i> | 10p11.21 | DRC, CIV                | HIV                | 2.42E-07 | [86]      |
| <i>HLA-A</i>    | 6p22.1   | ZAM, CAM                | HIV/TB             | 4.70E-06 | [87]      |
| <i>HLA-DQA1</i> | 6p21.32  | UBB, DRC                | HIV/TB             | 4.70E-06 | [87]      |
| <i>HLA-DQB1</i> | 6p21.32  | UBB, DRC                | HIV/TB             | 4.70E-06 | [87]      |
| <i>KIR3DL1</i>  | 19q13.42 | UNL, CIV                | Malaria            | 1.63E-09 | [88, 89]  |
| <i>CD36</i>     | 7q21.11  | UNL, CAM, CIV           | Malaria            | 1.55E-06 | [90]      |
| <i>DDC</i>      | 7p12.2   | UBB, DRC, GAS           | Malaria            | 1.63E-09 | [91]      |
| <i>HBE1</i>     | 11p15.4  | UBB, CAM, DRC           | Malaria            | 5.48E-07 | [92]      |
| <i>ADCY9</i>    | 16p13.3  | UNL, CIV                | Malaria            | 5.48E-07 | [93]      |

866

867

868

869

870

871



872 **Table 5.** Genes that are highly differentiated between the Nilo-Saharan and Trypanogen Niger-Congo populations that contain SNPs  
873 unique to UNL population

874  
875

| Chr | Gene            | Position of<br>Unique SNP | UNL unique<br>SNP | iHS<br>pvalue | Differentiated<br>loci | Mean Fst | Bonferroni<br>pvalue | Rsb<br>pvalue |
|-----|-----------------|---------------------------|-------------------|---------------|------------------------|----------|----------------------|---------------|
| 22  | <i>APOBEC3G</i> | 22:39453783               | rs112077004       | 4.002         | rs5757467              | 0.110    | 8.17E-23             | 4.116         |
| 3   | <i>TOP2B</i>    | 3:25670166                | rs11712723        | 3.000         | rs6786520              | 0.115    | 4.80E-11             | 4.151         |
| 1   | <i>CAPN9</i>    | 1:230886378               | rs113802713       | 3.362         | rs16852681             | 0.105    | 1.89E-08             | 5.632         |
| 7   | <i>LANCL2</i>   | 7:55476708                | rs62457872        | 3.019         | rs3807360              | 0.109    | 1.89E-08             | 3.269         |
| 3   | <i>NEK4</i>     | 3:52762698                | rs11130321        | 3.101         | rs6445535              | 0.111    | 1.51E-04             | 6.871         |
| 20  | <i>GDAP1L1</i>  | 20:42907542               | rs1884607         | 3.187         | rs4810417              | 0.114    | 0.003070493          | 3.931         |
| 2   | <i>NBAS</i>     | 2:15527280                | rs6723183         | 3.763         | rs4668447              | 0.123    | 0.053555484          | 3.020         |
| 3   | <i>PBRM1</i>    | 3:52698560                | rs12488527        | 3.130         | rs2878632              | 0.113    | 0.053555484          | 6.742         |
| 17  | <i>ZPBP2</i>    | 17:38031164               | rs11658278        | 3.115         | rs9903250              | 0.113    | 0.053555484          | 3.384         |
| 12  | <i>MGAT4C</i>   | 12:86435551               | rs11513957        | 3.134         | rs1502802              | 0.113    | 0.060467781          | 3.520         |
| 11  | <i>FAT3</i>     | 11:92291634               | rs675654          | 3.063         | rs2852859              | 0.112    | 0.061504234          | 3.582         |
| 9   | <i>MEGF9</i>    | 9:123462573               | rs75959206        | 3.046         | rs1530370              | 0.113    | 0.061504234          | 4.958         |

## Figures

**Figure 1.** Multi dimensional scaling (MDS) analysis of the sequenced TrypanoGEN samples, Guinea (GAS), Ivory Coast (CIV), Cameroon (CAM), Democratic Republic of Congo (DRC), Uganda (Nilotics, UNL, Bantu, UGB) and Zambia (ZAM), (**A**); **B**, TrypanoGEN and selected 1000 genomes African samples Nigeria (ESN, YRI), Sierra Leone (MSL), Gambia (GWD), Kenya (LWK); The black circles indicate the clustering of the samples into the West African Niger-Congo-A, Nigerian Niger-Congo-A, Central African Niger-Congo-B, East African Niger-Congo-B and the Nilo-Saharan Lugbara (NSL); **C**, 1000 genomes samples from Africa and the rest of the world. AAM, African Americans; AMR, indigenous Americans; CAF, Central Africa; EAF, East Africa; EAS, East Asia; EUR, Europe; NSA, Nilo-Saharan; SAS, South Asia; WAF, West Africa;

**Figure 2.** Genetic admixture and diversity between TrypanoGEN and selected 1000 genome populations. **A.** Admixture plot of the K populations of the TrypanoGEN, 1000 genome African and European populations. **B.** Heatmap of mean  $F_{st}$  between TrypanoGEN and 1000 genome African populations. **C.** Polynomial regression plot of the mean  $F_{st}$  against the relative geographical distance of the African Niger-Congo populations from the Uganda Nilotic population. **D.** Phylogeographic plot of the mean  $F_{st}$  distances on the Trypanogen populations and selected 1000 genome African populations; the pie charts represent the population sample size and admixture.

**Figure 3.** Population sizes and cross-coalescence rates compiled by MSMC. **A** Effective population sizes for each population since 75kya. The Ugandan Bantu and Nilotic populations have grown continuously but at a slower rate than the West and

Central African populations since 13kya. These latter populations experienced declines of 6-23% between 1500 and 800 years ago. **B** Cross-coalescence rates for pairs of populations. At 1.0 populations are panmictic and at 0.0 there is no gene flow. The Guinea and Ivory Coast populations were panmictic until about 10 kya and then became separated by 3kya. Other populations appear to have separated more gradually but these may be confounded by admixture.

**Figure 4.** Illustration of signatures unique to the Uganda Nilotic population. Signal of positive selection within the *APOBEC3G* gene on Chromosome 22 at the rs112077004 loci of the Uganda Nilo-Saharan Lugbara population, in comparison with the Niger-Congo B populations of Uganda (UGB) and Niger-Congo A population of Guinea (GAS). **A.** The calculated site specific extended haplotype homozygosity (EHH) within a population. **B.** Between population Fst analysis. **C.** Across population (XPEHH) analysis.

**Figure 5.** Migrations of Niger-Congo speakers. Map colours show vegetation coverage approximately 10kya [94]. Colours for linguistic groups as for Figure 2. Blue Nilo-Saharan; Yellow, Niger-Congo A; Red, Niger-Congo-B (Bantu); Green putative expansion of an ancestral group out of modern Nigeria. Blue dotted arrow, suspected route of proto-Niger-Congo-A speakers from Nuba mountains of Sudan to Senegal across the Sahel [95] when it was much wetter than at present.

**Additional files**

**Additional file 1:** Table S0.xlsx. List of participant samples sequenced indicating their sequencing ID, country of origin, language and sex of the individual.

**Additional file 2:** Figure S1-S3.pdf: Figure S1. Variant annotation of the population whole genome sequence (WGS) data using snpEff. **a.** count of number of substitutions for each base combination, **b.** count of number of Insertion-Deletions with corresponding InDel length of affected loci **c.** Count of number of sites with Transition-Transversion ratios with the corresponding allele frequency, **d.** Percentage count of the variant annotation classifications. Figure S2. Plot of the coefficient of variation (CV) error verses the K population (number of clusters). The K population with the lowest CV error is considered as the most appropriate K for the admixture. Figure S3. Bar plot of the mean  $F_{ST}$  between TrypanoGEN populations.

**Additional file 3:** Table S1.xlsx. Table showing MSMC output of effective populations sizes at different time points

**Additional file 4:** Figure S4.pdf. Extended haplotype homozygosity analysis of the TrypanoGEN populations for signatures of natural selection. **A.** Manhattan plot of the Intra-population integrated haplotype score (iHS) showing SNPs with extreme positive ( $> 2.5$ ) and extreme negative ( $< -2.5$ ). **B.** Bar plot showing the number of SNPs associated with protein coding with  $iHS > 3.0$  in each population (black) and those within each population that overlap with the UNL population (grey). Distribution of the iHS scores compared by **C.** Histograms and **D.** QQ plots.

**Additional file 5:** Table S2.xlsx. List of SNPs with Ensembl annotation of the nearest

protein coding gene and  $iHS > -\log p \ 3.0$ . It contains sheets for the TrypanoGEN populations and combined sheet for all population genes and DAVID derived Genetic associated diseases (GAD) and KEGG pathway affiliation

**Additional file 6:** Table S3.xlsx. List of signature SNPs associated with protein coding genes, with  $iHS > -\log p \ 3.0$  and unique to the Nilo-Saharan Lugbara population.

**Additional file 7:** Figure S5.pdf. PANTHER Gene ontology database classification of the Nilo-Saharan Lugbara unique genes based on the Biological process and protein class they belong to. X-axis indicates the process and Y-axis the number of genes corresponding to the process.

**Additional file 8:** Table S4.xlsx. List of SNPs that are highly differentiated between the Niger-Congo and Nilo-Saharan Lugbara populations.

**Additional file 9:** Figure S6.pdf. Manhattan plot of the  $R_{sb}$  (A) and  $F_{ST}$  (B) against the whole genome (chromosome 1 - 22) between the Nilo-Saharan Lugbara (UNL) and TrypanoGEN Niger-Congo populations. C. Scatter plot of inter-population  $F_{ST}$  against  $R_{sb}$  scores for the SNPs having a high  $F_{ST}$  ( $> 0.99$  percentile) and high  $R_{sb}$  ( $-\log p\text{-value} > 3.0$ ) between UGN and the Niger-Congo TrypanoGEN populations. D. Venn diagram showing the number of intersecting protein coding SNP loci between the high  $R_{sb}$ - $F_{ST}$  (UNL verses All populations (CAM, CIV, GAS, UBB, ZAM) and high  $iHS$  ( $-\log p\text{-value} > 3$ ) protein coding loci unique to the UNL population only.

**Additional file 10:** Figure S7. Analysis of SNP loci in APOBEC3G gene (Chr22:39480259-39485103). A. Plot of SNP minor allele frequency (MAF) against chromosome position in the gene, the red dot is the position of rs112077004. B.

974 Haploview plot of Linkage Disequilibrium (LD) of haplotypes within the gene, **C.**  
 975 Zoomed LD plot of the SNPs upstream and downstream of the rs112077004 loci  
 976 which is unique to the UGN population. **D.** Ensemble gene analysis of *APOBEC3G*  
 977 gene locus on the GRCH37 build indicating the position of SNP rs112077004.

978 **Additional file 11:** Table S5.xlsx. Analysis of SNPs in the APOBEC3G gene  
 979 including the minor allele frequency (MAF) and linkage disequilibrium (LD)  
 980 statistics.

981 **Additional file 12:** Figure S8.pdf. Bar plots comparing the mean iHS *P*-values of the  
 982 SNP loci in *APOL1*, *HPR*, *HLA*, and *IL6* genes within the TrypanoGEN  
 983 populations. These genes are associated with progression of Human African  
 984 Trypanosomiasis.

985 **Additional file 13:** Table S6.xlsx. Population iHS scores of SNPs in genes that play a  
 986 role in African trypanosomiasis pathology

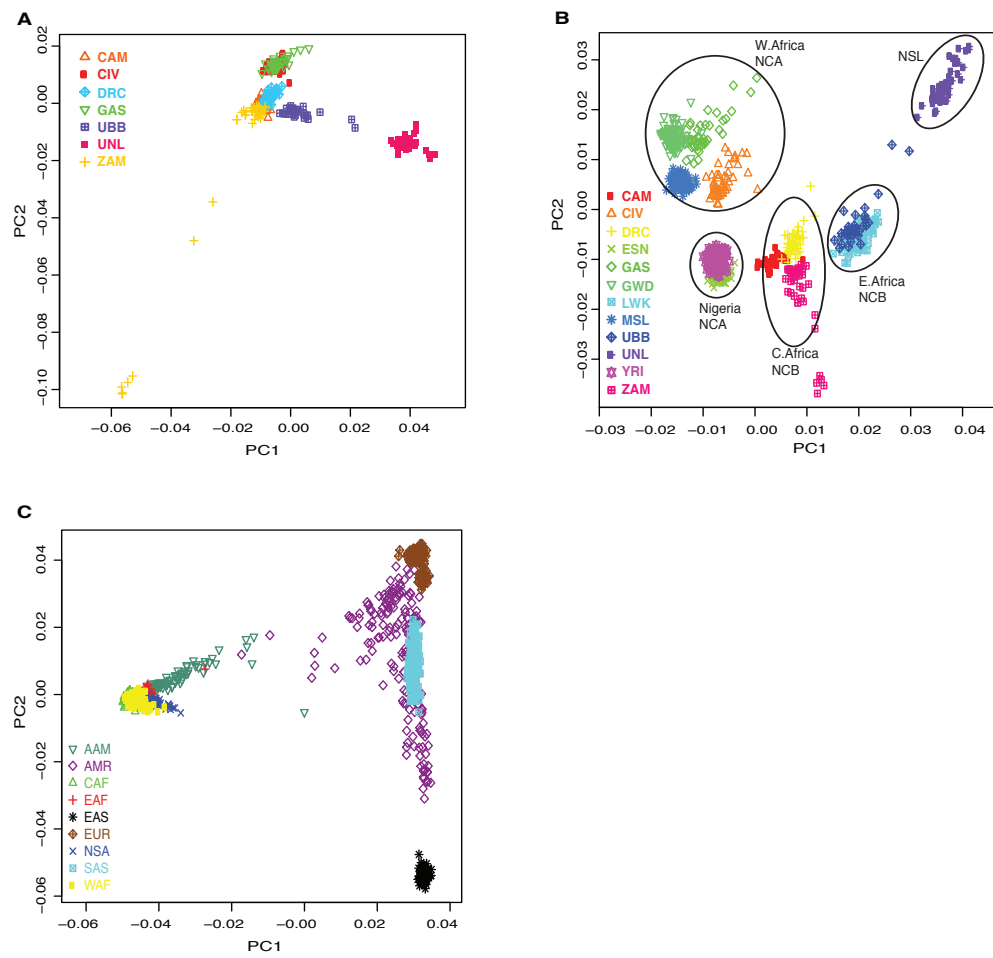

987

988 Figure 1

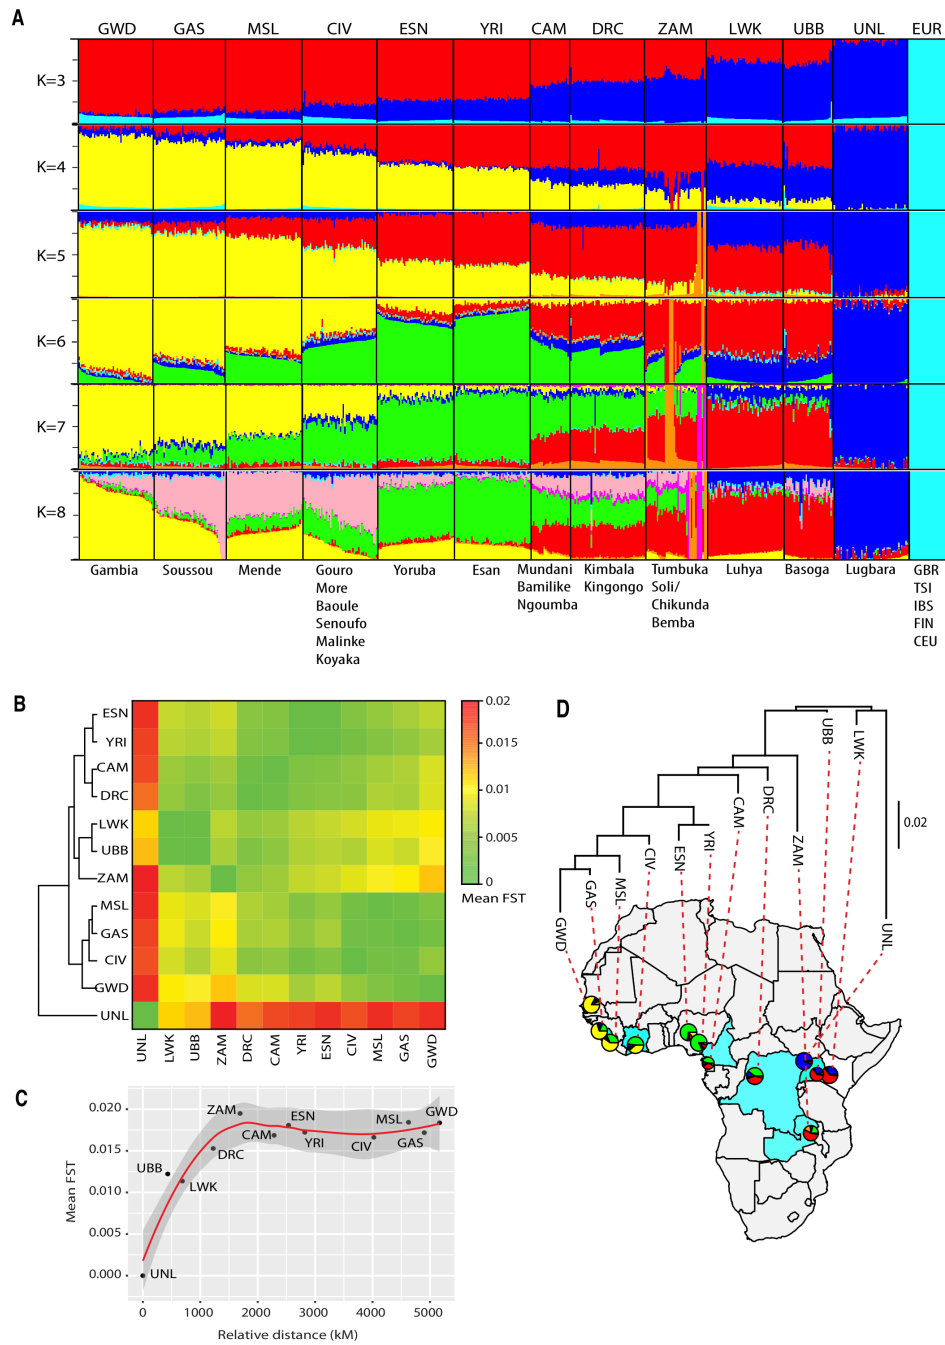

989

990 Figure 2



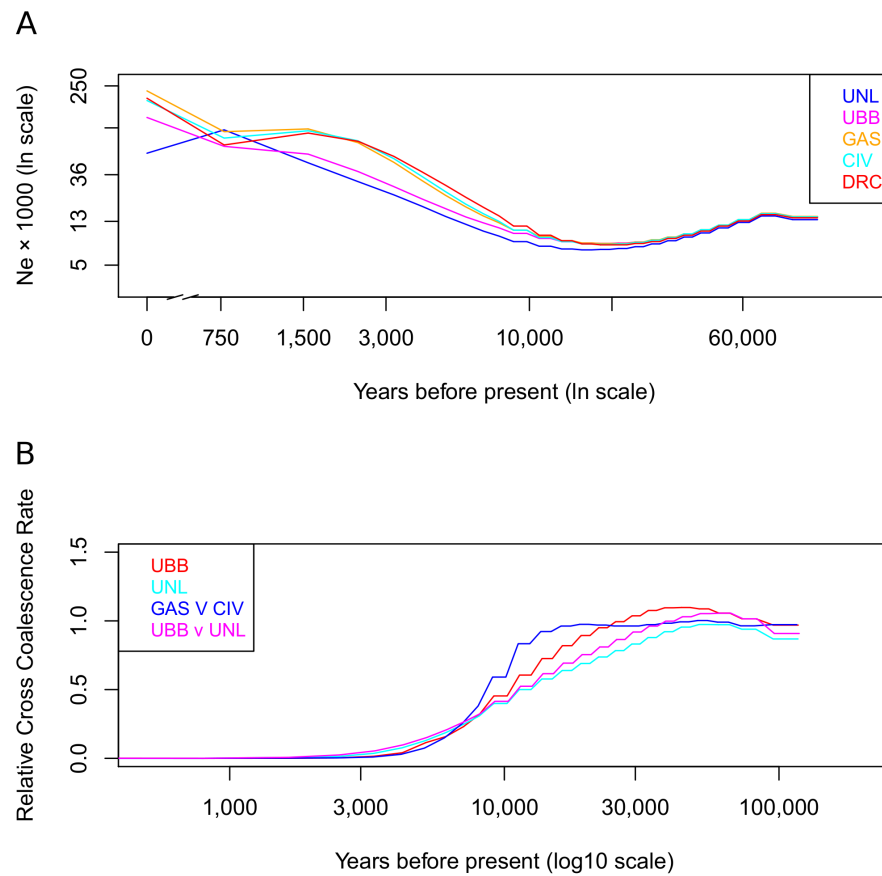

991

992 Figure 3

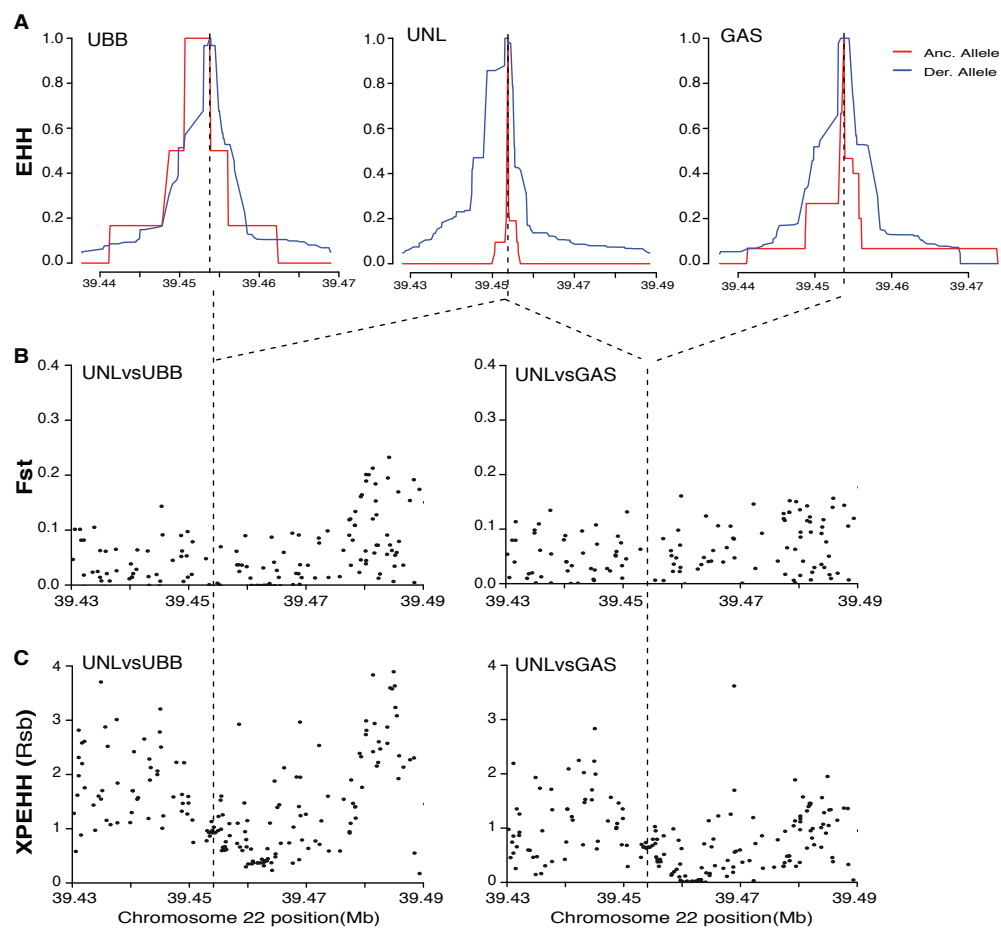

Figure 4

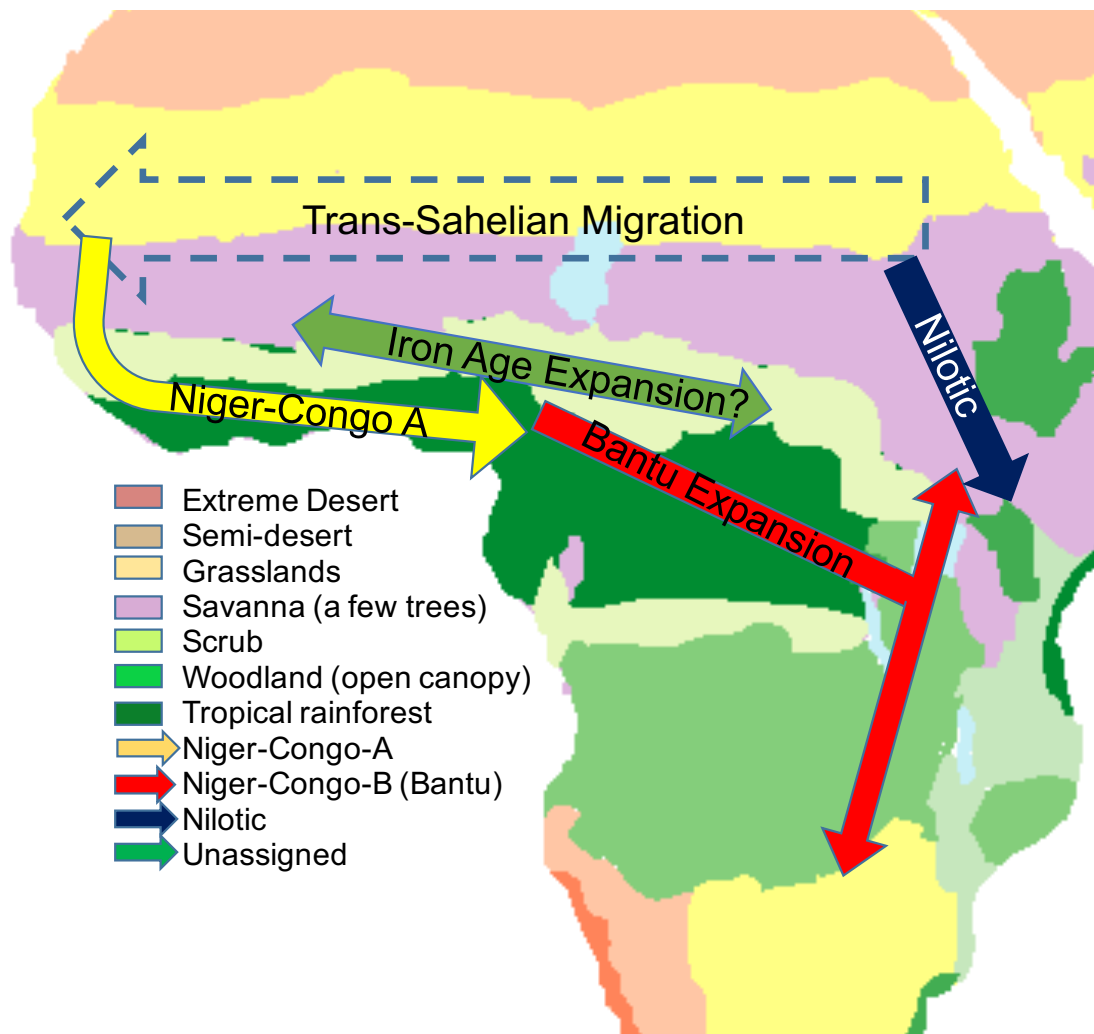

995

996 Figure 5
